# Supplementary material for: Nitrate and a nitrate-reducing Rothia aeria strain as potential prebiotic or synbiotic treatments for periodontitis
Source: PubMed Central journal article supplement (PMC10276839; doi:10.1038/s41522-023-00406-3), 2023-06-17
Supplement: 41522_2023_406_MOESM1_ESM.pdf [file 41522_2023_406_MOESM1_ESM.pdf]

# **Nitrate and a nitrate-reducing *Rothia aeria* strain as potential prebiotic or synbiotic treatments for periodontitis**

Danuta Mazurel<sup>1,2</sup>, Miguel Carda-Diéguez<sup>1</sup>, Thomas Langenburg<sup>1</sup>, Miglė Žiemytė<sup>1</sup>, William Johnston<sup>3</sup>, Carlos Palazón Martínez<sup>1</sup>, Fernando Albalat<sup>4</sup>, Carmen Llena<sup>5</sup>, Nezar Al-Hebshi<sup>6</sup>, Shauna Culshaw<sup>7</sup>, Alex Mira<sup>1†</sup>, Bob T. Rosier<sup>1†</sup>

Affiliations:

<sup>1</sup> Genomics & Health Department, FISABIO Institute, Valencia (Spain)

<sup>2</sup> Department of Preventive Dentistry, Academic Center for Dentistry Amsterdam (ACTA), University of Amsterdam and VU University Amsterdam (Netherlands)

<sup>3</sup> Department of Biological and Biomedical Sciences, Glasgow Caledonian University, Glasgow (UK)

<sup>4</sup> Centro Periodontal de Valencia (Spain)

<sup>5</sup> Department of Stomatology, University of Valencia (Spain)

<sup>6</sup> Oral Microbiome Research Laboratory, Kornberg School of Dentistry, Temple University, Philadelphia, Pennsylvania (United States).

<sup>7</sup> Oral Sciences, Glasgow Dental Hospital and School, School of Medicine, Dentistry and Nursing, College of Medical, Veterinary and Life Sciences, University of Glasgow, Glasgow (UK)

†Corresponding authors:

Alex Mira, Department of Health and Genomics, FISABIO Foundation, 46020 Valencia (Spain); tel. +34 961925925, e-mail: mira\_ale@gva.es

Bob T. Rosier, Department of Health and Genomics, FISABIO Foundation, 46020 Valencia (Spain); tel. +34 961925967, e-mail: rosier\_bob@gva.es

## Supplementary Information

**Supplemental Table 1.** General characteristics and clinical information of patients.

| Treatment group           | Treatment conditions                                    | Gender (n) |    | Age (years)<br>Mean $\pm$ SD | Smoking (n) |    | Deepest pocket depth (mm)<br>Mean $\pm$ SD |
|---------------------------|---------------------------------------------------------|------------|----|------------------------------|-------------|----|--------------------------------------------|
|                           |                                                         | M          | F  |                              | Yes         | No |                                            |
| 5 mM nitrate<br>(n = 20)  | Control and 5 mM nitrate (n = 9)                        | 3          | 6  | 59 $\pm$ 9                   | 2           | 7  | 7.3 $\pm$ 2.0                              |
|                           | Control, 5 mM nitrate, 5 mM nitrate + Ra9, Ra9 (n = 11) | 5          | 5  | 37 $\pm$ 9                   | 5           | 6  | 5.7 $\pm$ 1.9                              |
|                           | Combined (n = 20)                                       | 8          | 11 | 45 $\pm$ 14                  | 7           | 13 | 6.4 $\pm$ 2.1                              |
| 50 mM nitrate<br>(n = 10) | Control and 50 mM nitrate (n = 10)                      | 8          | 3  | 52 $\pm$ 15                  | 4           | 6  | 6.4 $\pm$ 1.6                              |
| <b>Total (n = 30)</b>     |                                                         | 16         | 14 | 49 $\pm$ 14                  | 18          | 12 | 6.4 $\pm$ 1.9                              |

Ra9: *Rothia aeria* CECT9999.

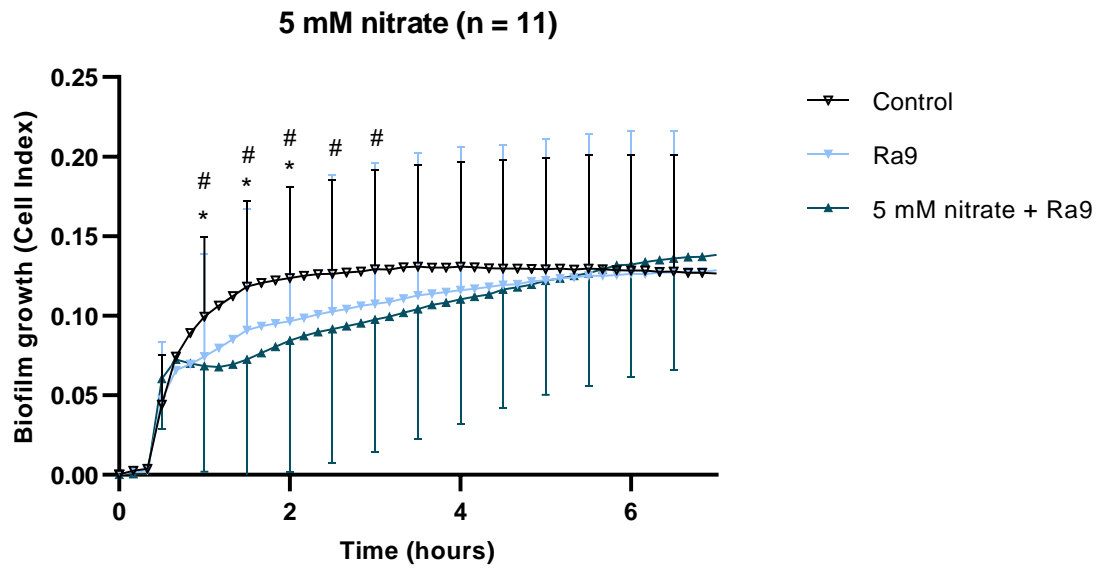

**Supplemental Figure 1. Effect of nitrate and *Rothia aeria* supplementation on periodontal biofilm formation.** Real-time 7 h growth curve of periodontal plaque biofilms (n = 11) grown *in vitro* supplemented with or without 5 mM nitrate and Ra9. Biofilm growth is expressed as Cell Index (CI) as determined using impedance measurements. Standard deviations are shown at 30 min intervals. Significant differences (p-value < 0.05 according to Wilcoxon matched-pairs signed-rank test) are marked by an asterisk (\*) for control versus Ra9 or a number sign (#) for control versus 5 mM nitrate + Ra9. Ra9: *Rothia aeria* CECT9999. The error bars represent the standard deviation of the mean.

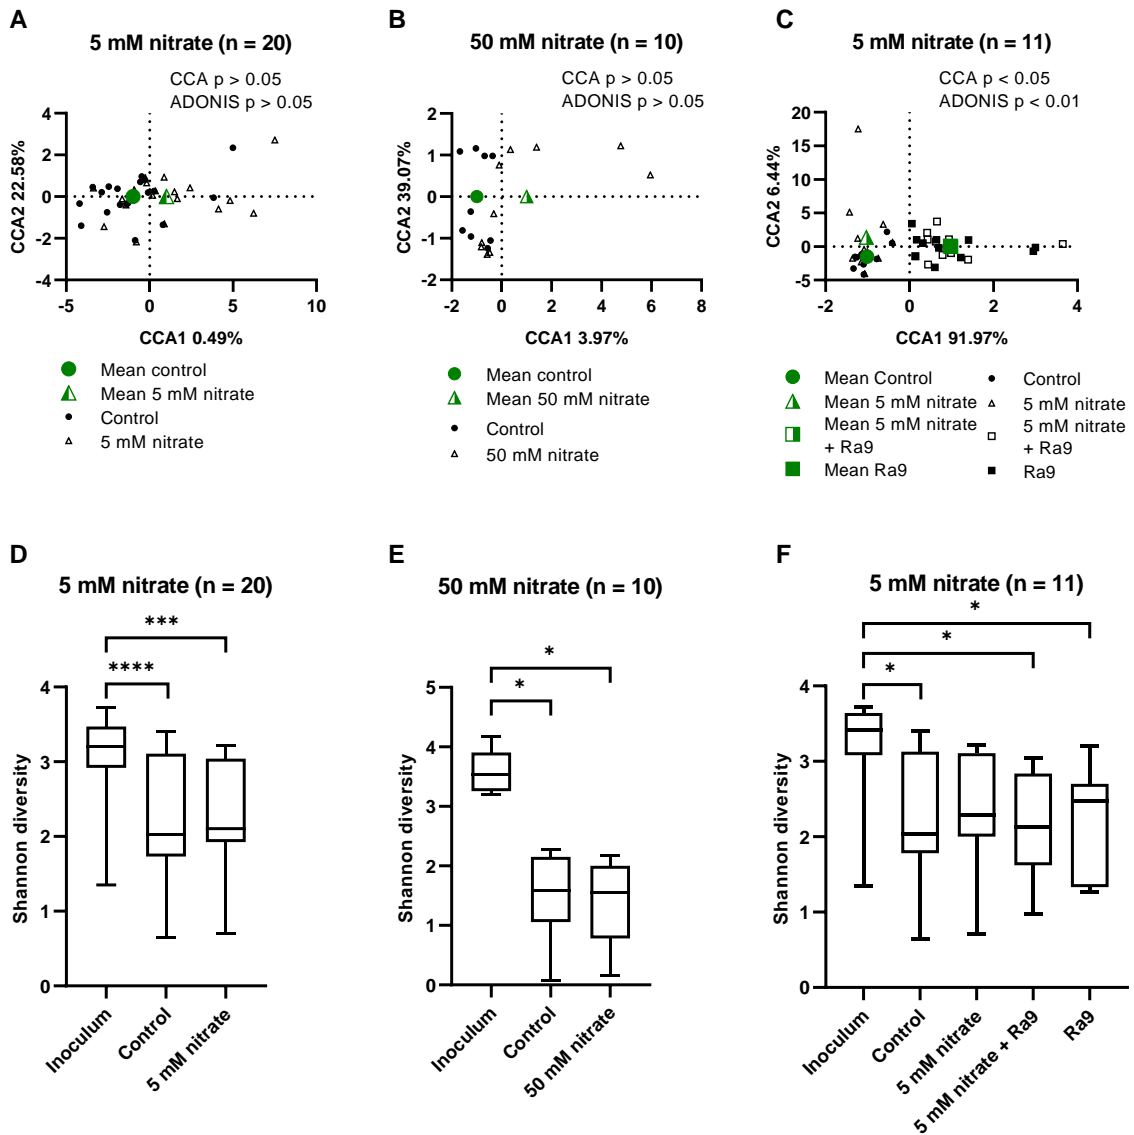

**Supplemental Figure 2. Effect of nitrate and *Rothia aeria* supplementation on in vitro periodontal biofilm composition and diversity.** CCA-plot of biofilm microbial composition of (A) biofilms supplemented with or without 5 mM nitrate (n = 20), (B) with or without 50 mM nitrate (n = 10), or (C) biofilms supplemented with or without 5mM nitrate or 5mM nitrate and Ra9 (n = 11). Shannon diversity of (D) biofilms supplemented with or without 5 mM nitrate (n = 20), and (E) with or without 50 mM nitrate (n = 10), or (F) biofilms (n = 11) supplemented with or without 5mM nitrate or 5mM nitrate and Ra9. The box and whisker plots show the median (central line), 25<sup>th</sup> to 75<sup>th</sup> percentile (box) and min to max (whiskers). Significant differences (adjusted p-value < 0.05

according to Wilcoxon matched-pairs signed rank test with Bonferroni correction for multiple comparisons) are marked by an asterisk (\*). Ra9: *Rothia aeria* CECT9999.
